# Supplementary material for: The structures of secretory and dimeric immunoglobulin A
Source: eLife. 2020 Oct 27;9:e56098. doi: 10.7554/eLife.56098 (PMC7707832; doi:10.7554/eLife.56098)
Supplement: Supplementary file 1. [file elife-56098-supp1.xlsx]

## Sheet: Sheet1
	Secretory IgA	Dimeric IgA
Accession codes
EM Databank	EMD-22310	EMD-22309
Protein Databank	7JG2	7JG1
Data Collection
Magnification	130000	105000		Citations:
Pixel size (Å)	0.652	0.836		[1]P. D. Adams et al., “PHENIX: a comprehensive Python-based system for macromolecular structure solution,” Acta Crystallogr D Biol Crystallogr, vol. 66, no. Pt 2, pp. 213–221, Feb. 2010, doi: 10.1107/S0907444909052925.
Defocus Range (µ)	1.0-3.5	1.0-3.6		[1]C. J. Williams et al., “MolProbity: More and better reference data for improved all-atom structure validation,” Protein Science, vol. 27, no. 1, pp. 293–315, 2018, doi: 10.1002/pro.3330.
Defocus Mean (µ)	1.23	1.45		[1]B. A. Barad et al., “EMRinger: Side-chain-directed model and map validation for 3D Electron Cryomicroscopy,” Nat Methods, vol. 12, no. 10, pp. 943–946, Oct. 2015, doi: 10.1038/nmeth.3541.
Frames per movie	40	40		[1]P. V. Afonine et al., “New tools for the analysis and validation of cryo-EM maps and atomic models,” Acta Cryst D, vol. 74, no. 9, pp. 814–840, Sep. 2018, doi: 10.1107/S2059798318009324.
Seconds per frame	0.03	0.05		[1]A. Punjani, J. L. Rubinstein, D. J. Fleet, and M. A. Brubaker, “cryoSPARC: algorithms for rapid unsupervised cryo-EM structure determination,” Nat Methods, vol. 14, no. 3, pp. 290–296, Mar. 2017, doi: 10.1038/nmeth.4169.
Movies selected	1266	2258
Dosage (e/Å^2)	60	60
Initial particles	1444292	1808799
Final particles	184737	288823
Map sharpening B-factor	-85	n/a
Resolution estimate (unmasked data)
Software	Phenix Cryo-EM Validation	Phenix Cryo-EM Validation
FSC (model)=0.143 (Å)	3.3	3.5
FSC (half map 1,2)=0.143 (Å)	3.5	3.8
Density and Fit
Model/Data CC
Mask	0.64	0.66
Box	0.78	0.83
Peaks	0.62	0.64
Volume	0.64	0.65
Model	Secretory IgA	Dimeric IgA
Refinement software	Phenix and Rosetta	Phenix and Rosetta
Validation software	Phenix	Phenix
Chains	11	8
Total atoms	24401	15852
Non-hydrogen atoms	12394	8003
Residues	1584	1045
Bond RMSD
Length (Å)	0.004	0.003
Angle (°)	1.02	0.75
MolProbity score	1.96	1.74
Clash score	6.63	4.98
Ramachandran plot (%)
Favored	88.14	92.35
Allowed	11.8	7.65
Outliers	0.06	0
Rotamer outliers (%)	0	0.33
Cβ outliers (%)	0.14	0
Peptide plane (%)
Cis proline	0	0
Twisted proline	0	0
CaBLAM outliers (%)	5.61	4.31
EMRinger score	1.72	1.24
